# Supplementary material
Source: PubMed Central journal article supplement (PMC7796999)
Supplement: NIHMS1644259-supplement-1.pdf [file NIHMS1644259-supplement-1.pdf]

## **Supplemental Materials**

### **STIM1 a calcium sensor promotes the assembly of an ECM that contains Extracellular vesicles and factors that modulate mineralization**

Yinghua Chen, Rahul Koshy, Elizabeth Guirado & Anne George\*

Brodie Tooth Development Genetics & Regenerative Medicine Research Laboratory  
Department of Oral Biology  
University of Illinois at Chicago  
Chicago, IL 60612, USA

\* To whom correspondence should be addressed.

Anne George  
Department of Oral Biology,  
312-413-0738  
FAX: 312-996-6044  
E-mail: [anneg@uic.edu](mailto:anneg@uic.edu)

**1. Supplement Figure S1: Localization of STIM1 and Orai1 in the mandibles of wild type and STIM1 KO mice:**

- A.** Expression of STIM1 in the differentiating odontoblasts, alveolar bone and dental pulp cells in 2-month old WT and STIM1 KO mouse heads. Boxes indicated as 1 and 2 have been magnified and the corresponding images are shown in the panel. P=pulp; OD=odontoblasts, Den = dentin and AB=alveolar bone.
- B.** Quantification of the immunohistochemical positive signals in odontoblasts (Od), pulp= (P) and alveolar bone (AB). Statistical significance: \*\*p<0.01.
- C.** Colocalization of STIM1 (green) and Orai1 (Red) in the dental pulp of day5 wild type mice.

**2. Supplement Figure S2: Gene expression analysis at day 0 in transgenic DPSCs:**

Gene expression analysis of the “early” and “late” differentiation markers expressed in control and genetically modified DPSCs at day 0. Statistically significant differences are indicated. \*: p<0.05, \*\*: p<0.01.

**3. Supplement Figure S3: Characterization of the crown and root dentin by micro-computed tomographic analyses:**

Dentin thickness, Dentin volume fraction (BV/TV) and tissue mineral density (TMD) are shown for 1, 2 & 3 month WT and STIM1 knockout

mice. Statistically significant differences are indicated. \*:  $p < 0.05$ , \*\*:  $p < 0.01$ .

**4. Supplement Figure S4: Characterization of the root dentin by  $\mu$ CT**

Representative micro-CT image of the first molar in 1, 2 & 3 months WT and STIM1-KO mice (n=6). The regions contoured for measuring dentin thickness were illustrated as red circles. Note reduced dentin thickness in 1, 2 and 3M STIM1-KO mice. Statistical significance: \*:  $p < 0.05$ .

**5. Supplement Figure S5: Live-cell imaging showing changes in spatial distribution of STIM1:**

Time-lapse imaging to show the spatial distribution of CFP-STIM1 in DPSCs in response to ER  $\text{Ca}^{2+}$  depletion by 500ng/ml of DMP1.

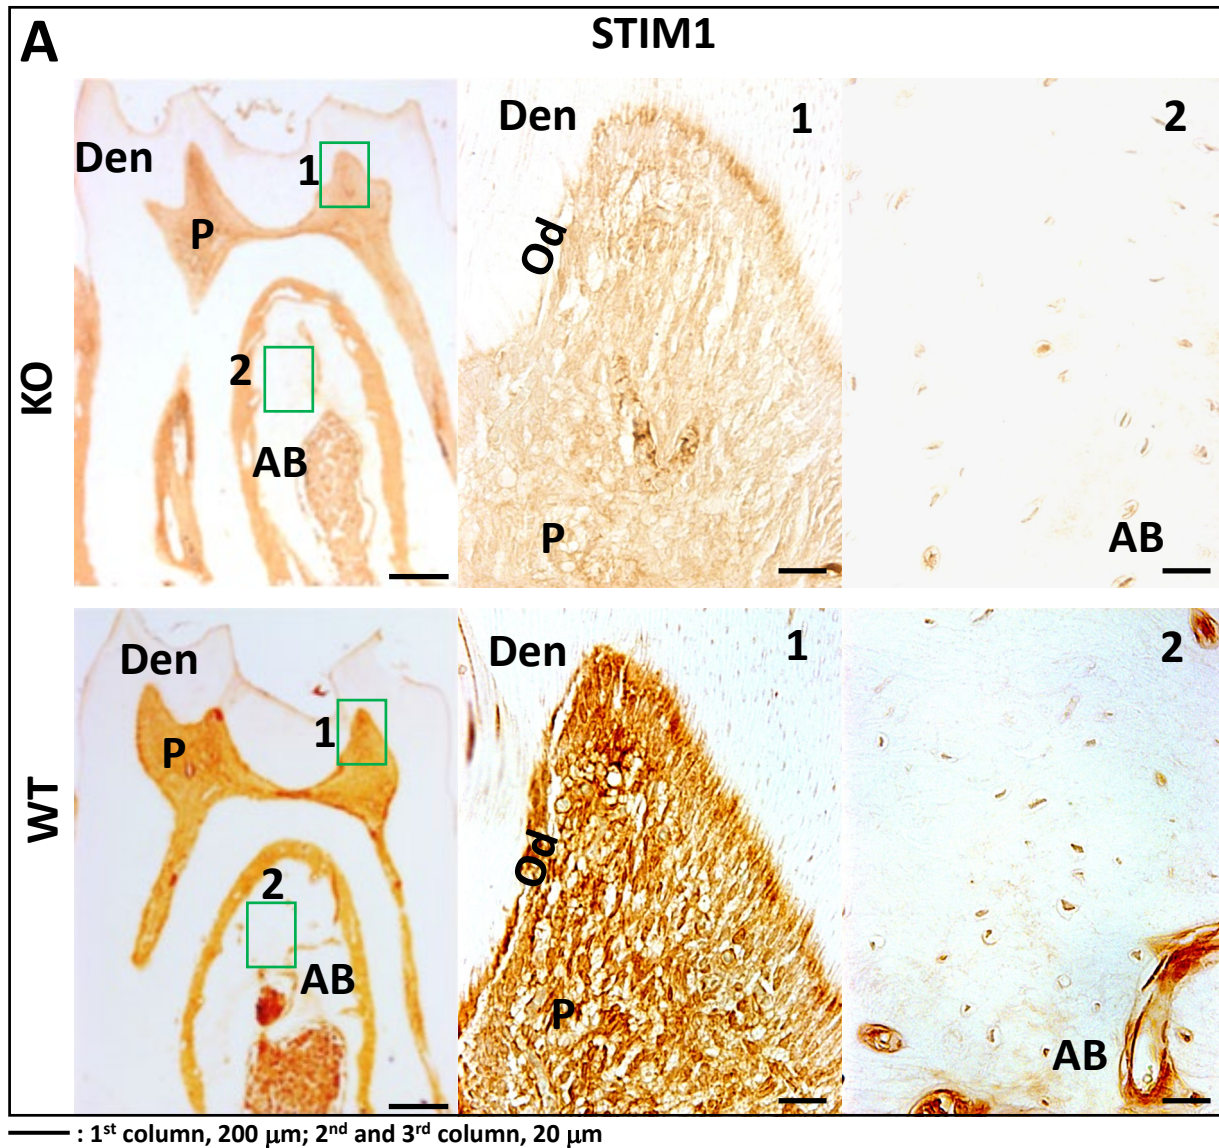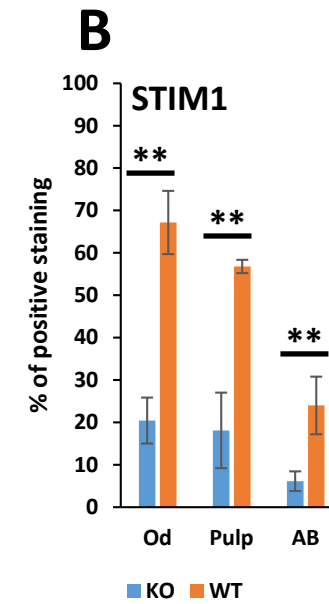

Supplemental Fig S1A-B: Localization of STIM1 and Orai1 in the mandibles of wild type and STIM1 KO mice:

C

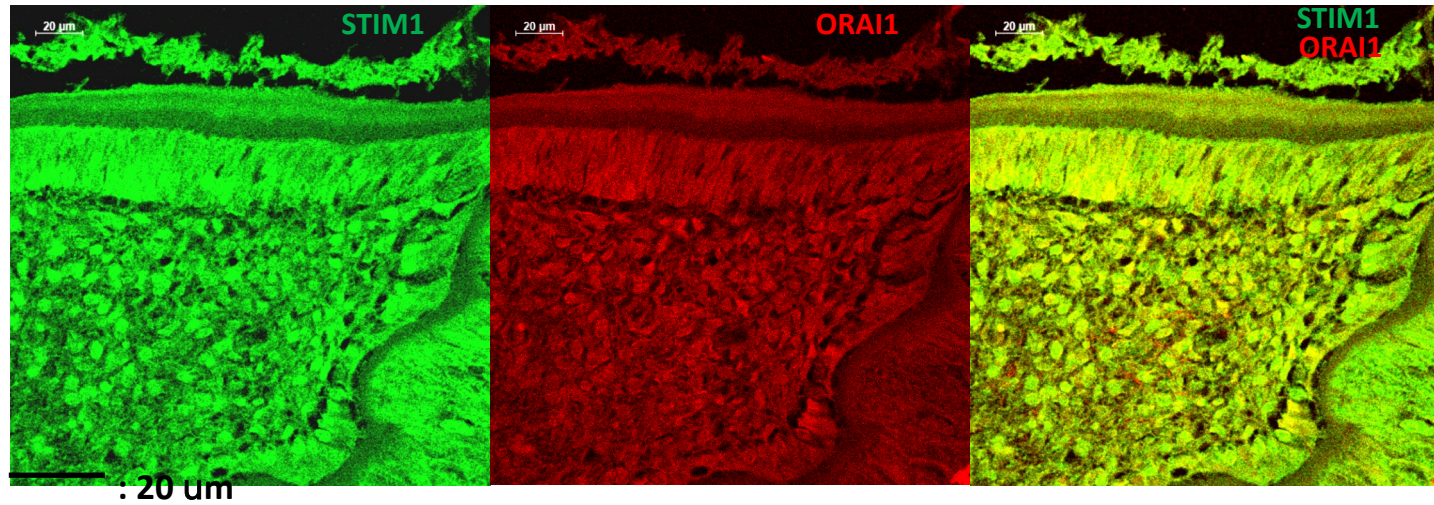

**Supplemental Fig S1C: Localization of STIM1 and Orai1 in the mandibles of 5 day wild type mice**

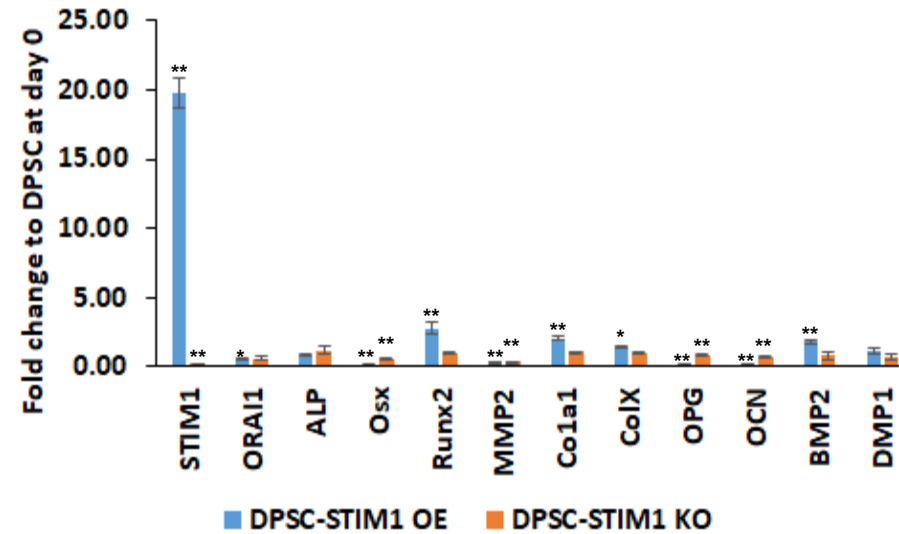

\*: p<0.05, \*\*: p<0.01

**Supplement Figure S2: Gene expression analysis at day 0 in transgenic DPSCs**

### Crown Dentin

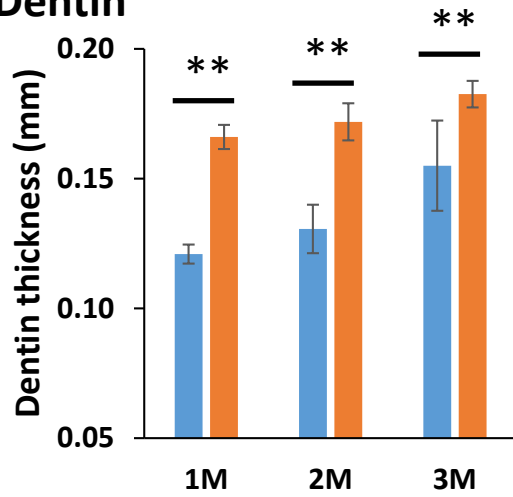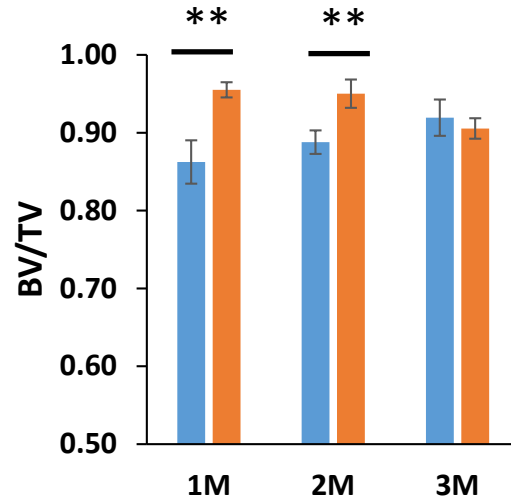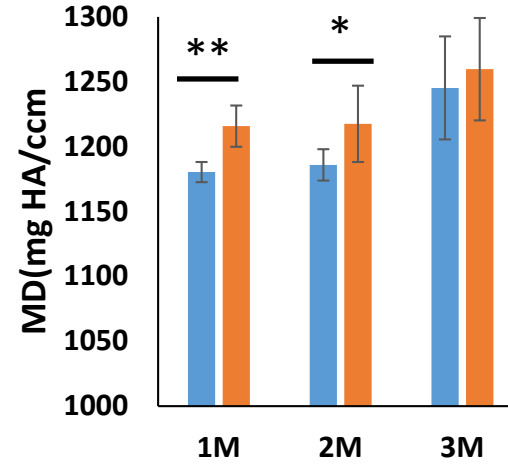

### Root Dentin

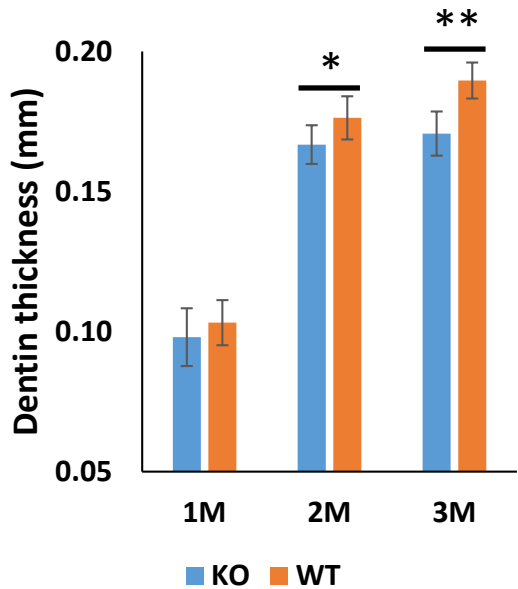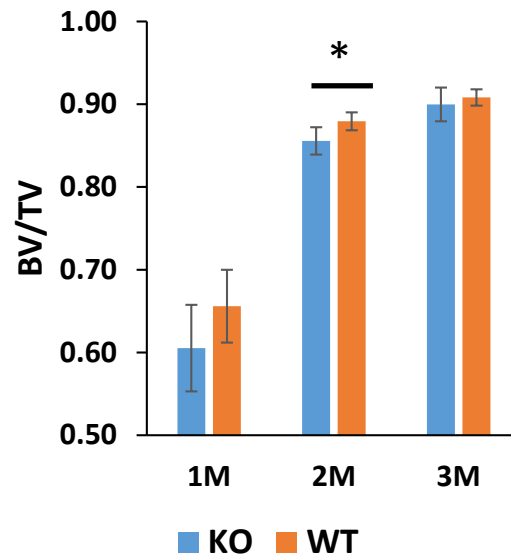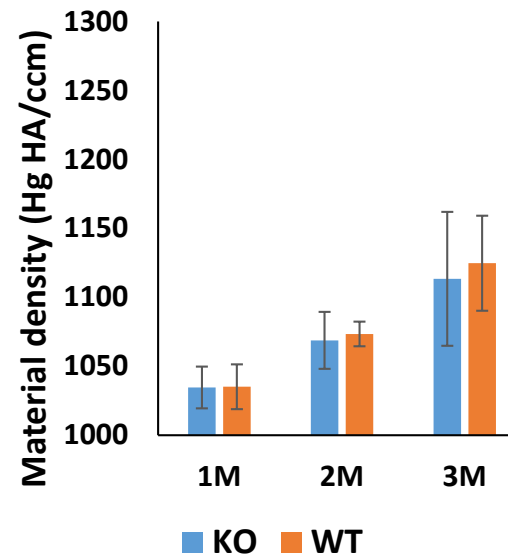

**Supplement Figure S3: Characterization of the crown and root dentin by micro-computed tomographic analyses**

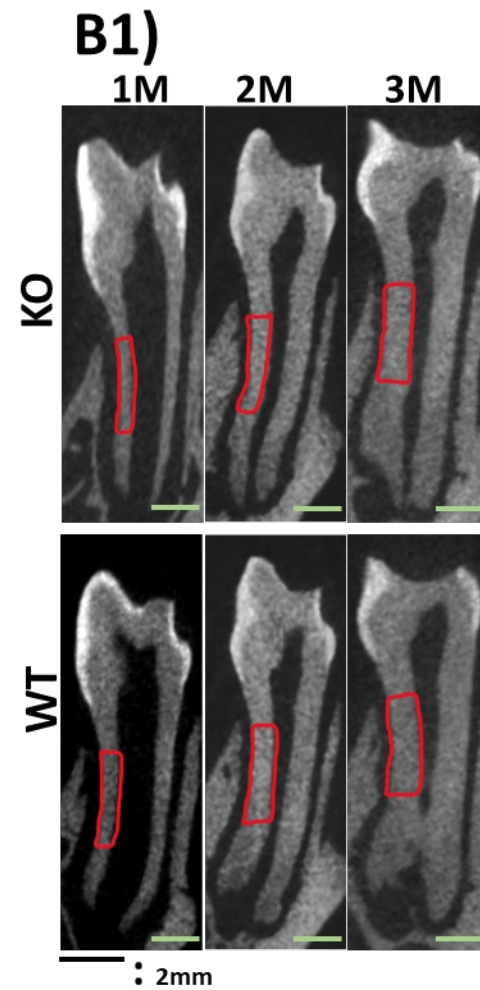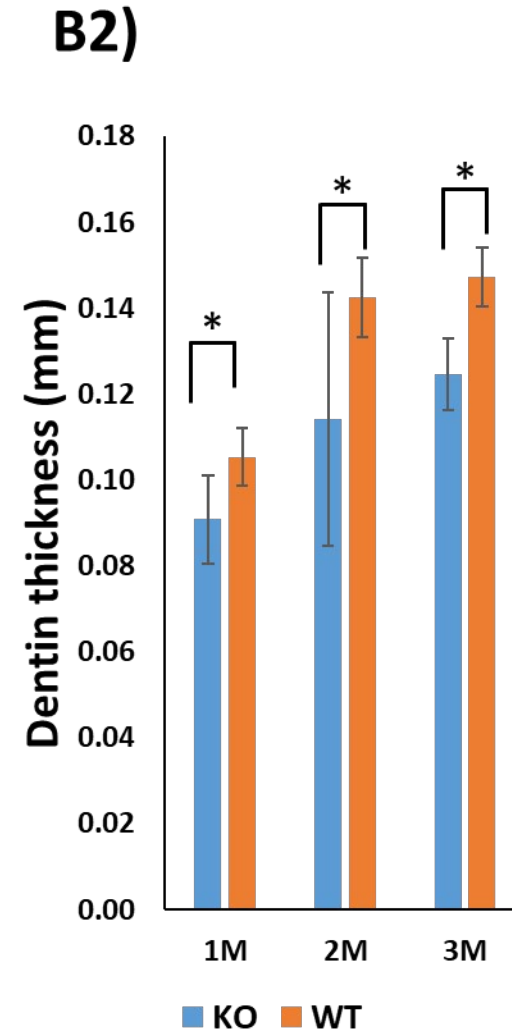

Supplement Figure S4: Characterization of the root dentin by  $\mu$ CT



Movie

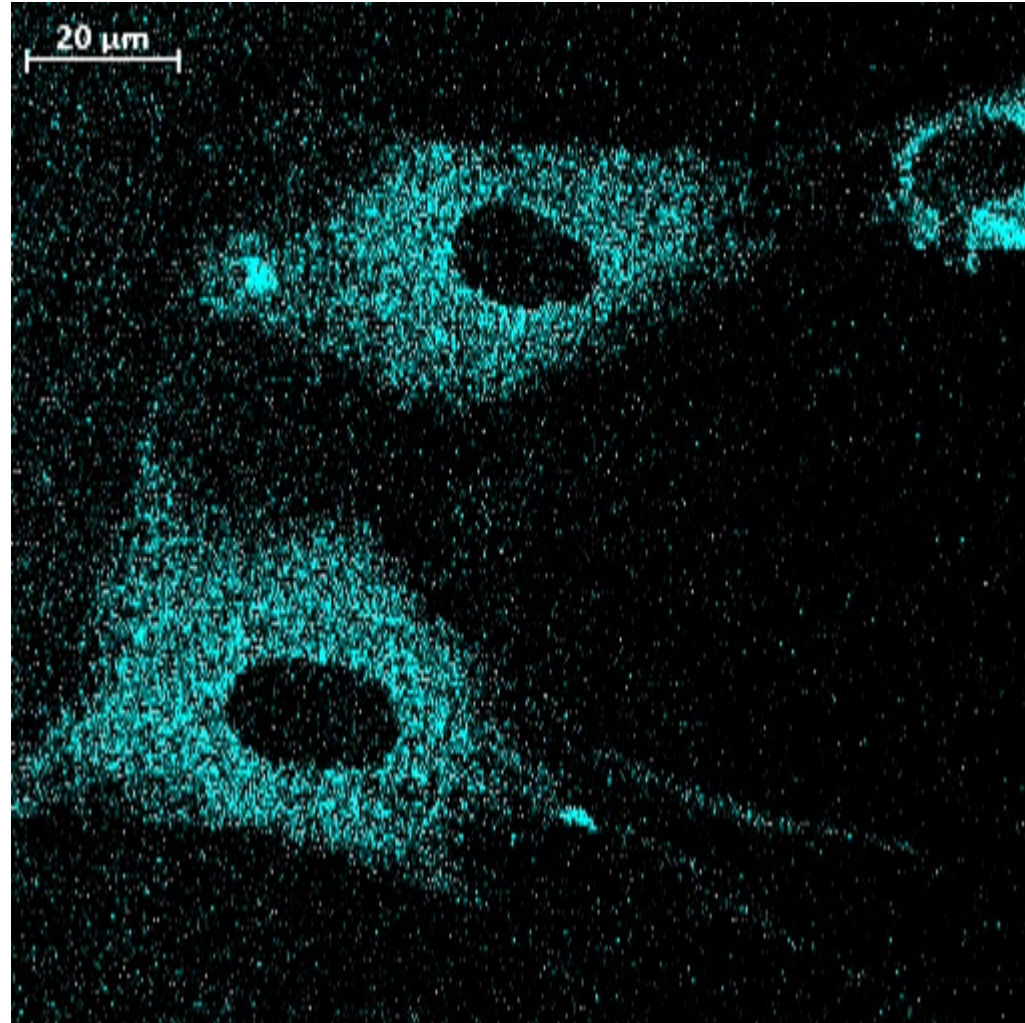

**Supplement Figure S5: Live-cell imaging showing changes in spatial distribution of STIM1**
